# Supplementary material for: A dual-functional matrix with high absorption and electrocatalysis to suppress the shuttle effect in lithium–selenium batteries
Source: Royal Society of Chemistry journal article supplement (doi:10.1039/d4nj01873g), 2024-01-01
Supplement: d4nj01873g1.pdf [file d4nj01873g1.pdf]

## Supporting Information

# **A dual-functional matrix with high absorption and electrocatalysis to suppress shuttle effect of lithium-selenium batteries**

Zihao He <sup>1</sup>, Lan Yang <sup>1</sup>, Hao He <sup>1</sup>, Wenyang Lei <sup>1</sup>, Ting Yu <sup>1</sup>, Qiushi Huang <sup>2</sup>, Hongxin Liao <sup>3</sup>, Xuebu Hu <sup>1</sup>✉

<sup>1</sup> College of Chemistry and Chemical Engineering, Chongqing University of Technology, Chongqing 400054, China

<sup>2</sup> College of Chemistry and Environmental Engineering, Yangtze University, Jingzhou 434023, China

<sup>3</sup> Chongqing Hongyu Precision Industry Group Co. Ltd, Chongqing 402760, China

\* Corresponding Author

Email address: xuebu@cqut.edu.cn (Xuebu Hu)

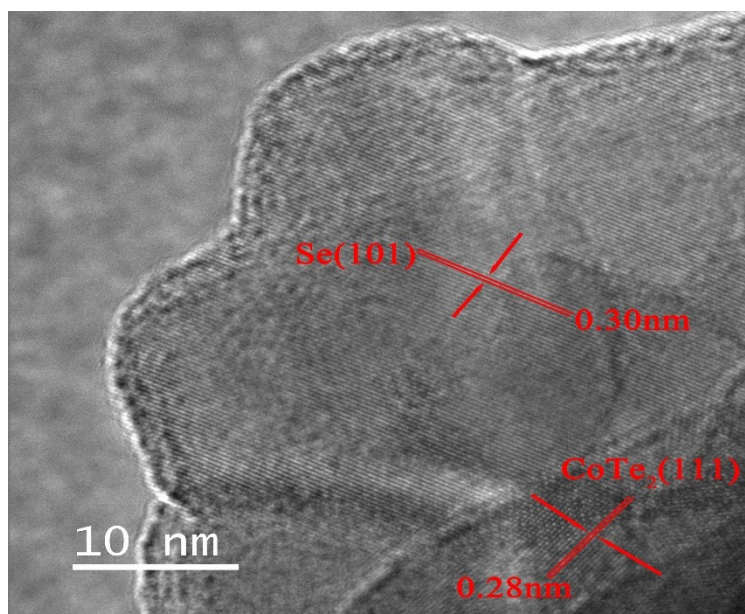

Fig. S1 TEM image of the Se/CoTe<sub>2</sub>-MD.

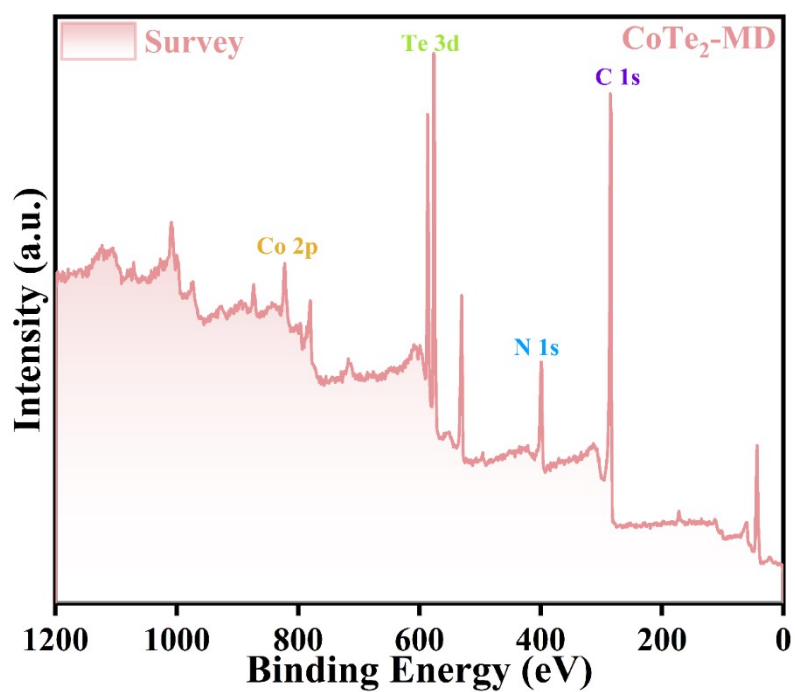

Fig. S2 High-resolution C 1s XPS spectra of the CoTe<sub>2</sub>-MD.

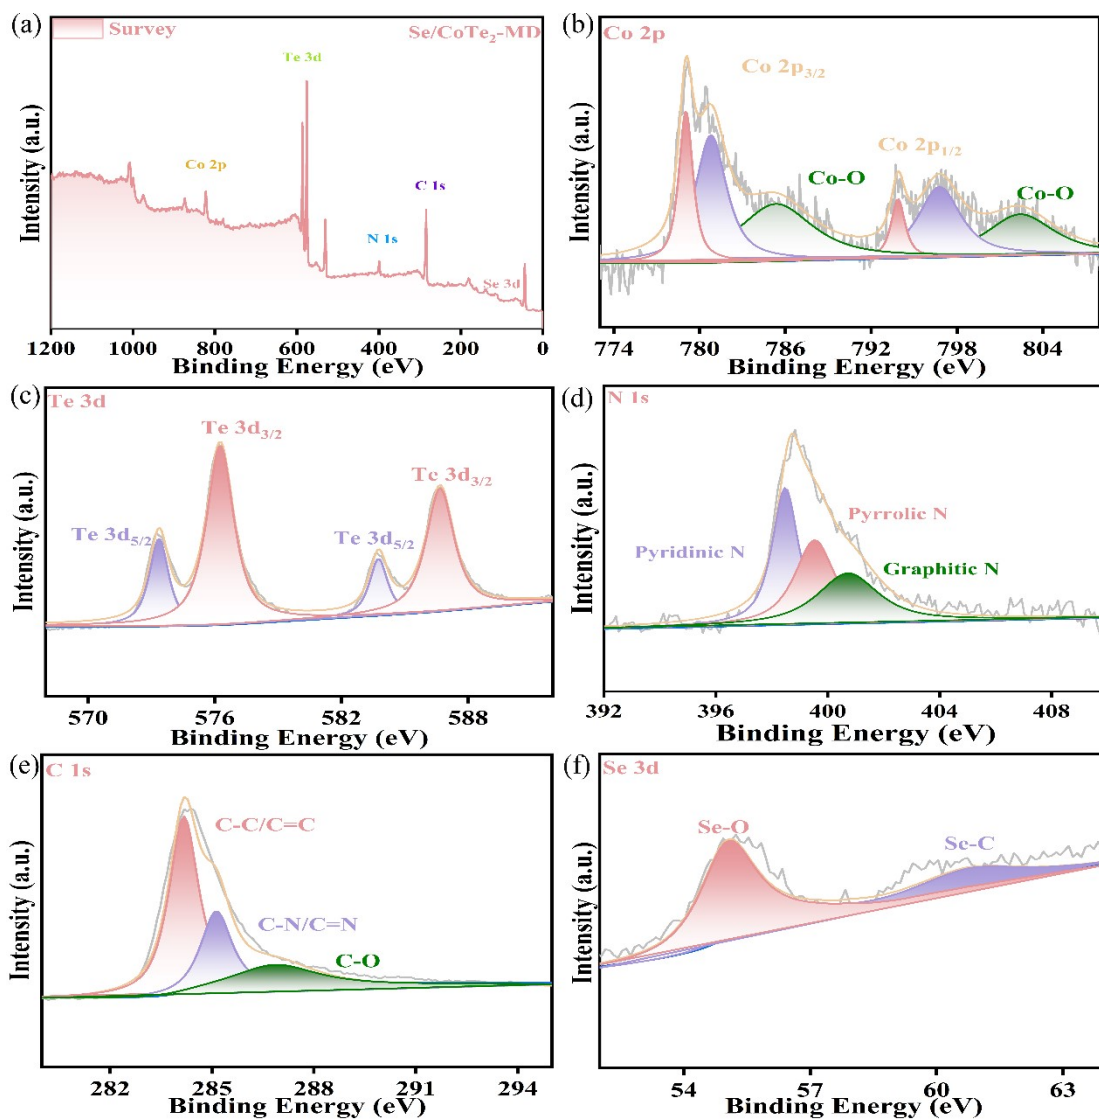

**Fig. S3** (a) Full-scan XPS spectra and the high-resolution spectra of (b) Co 2p, (c) Te 3d, (d) N 1s (e) C 1s and (f) Se 3d of the Se/CoTe<sub>2</sub>-MD.

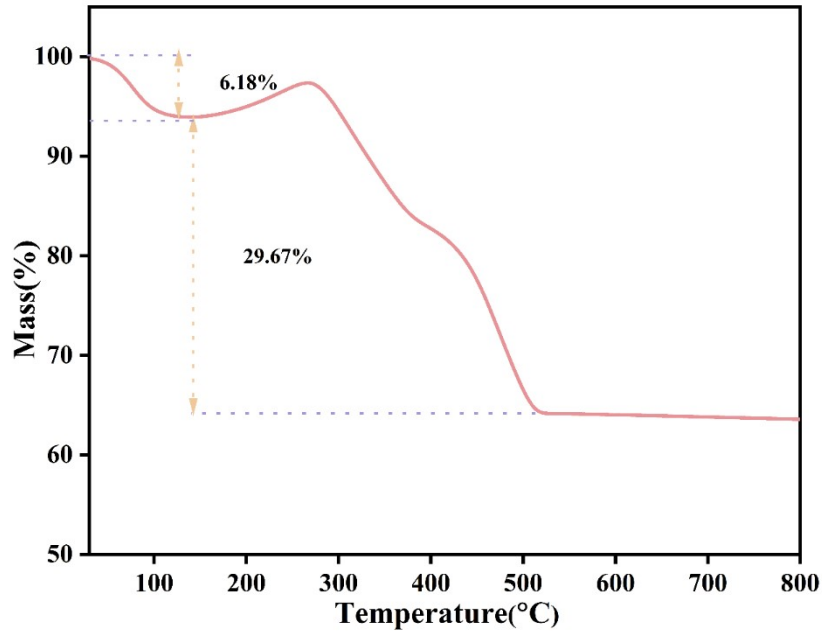

Fig. S4 TG curve of the CoTe<sub>2</sub>-MD in air atmosphere.

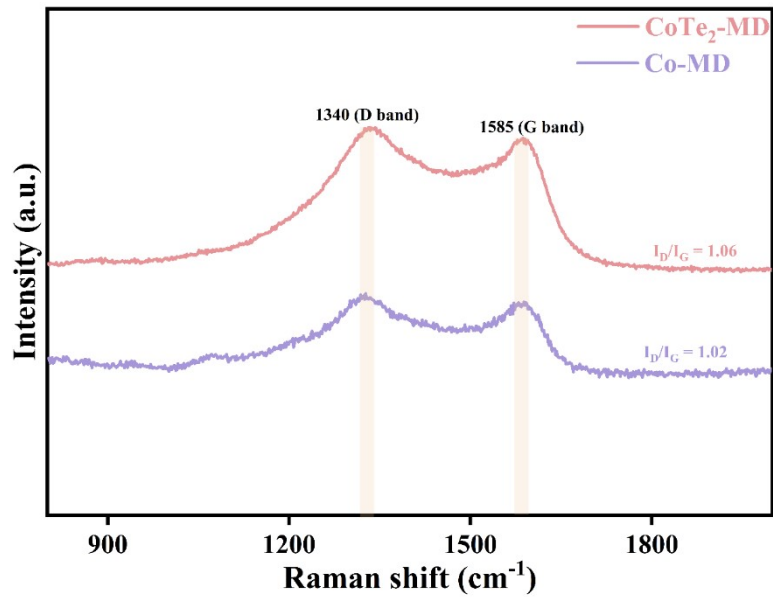

Fig. S5 Raman spectra of the CoTe<sub>2</sub>-MD and Co-MD.

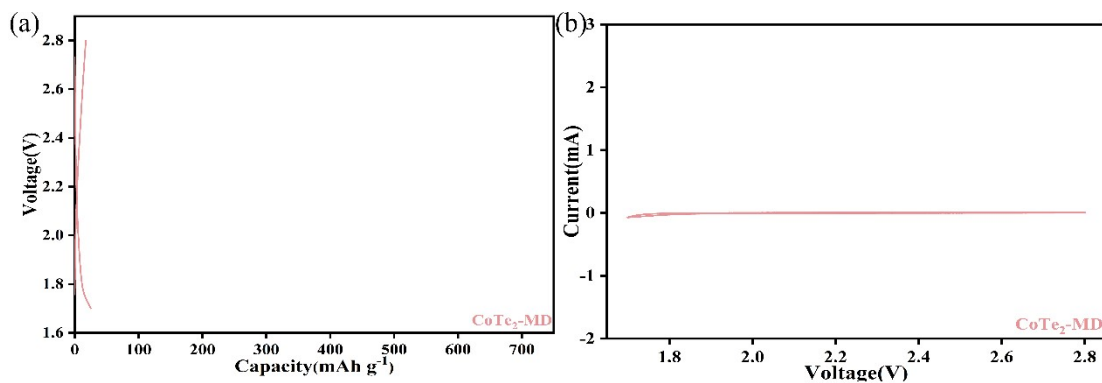

**Fig. S6** (a) Charge/discharge curves of the  $\text{CoTe}_2\text{-MD}$  electrode at 0.1 C and CV curve of the  $\text{CoTe}_2\text{-MD}$  electrode at 0.1 mV/s.

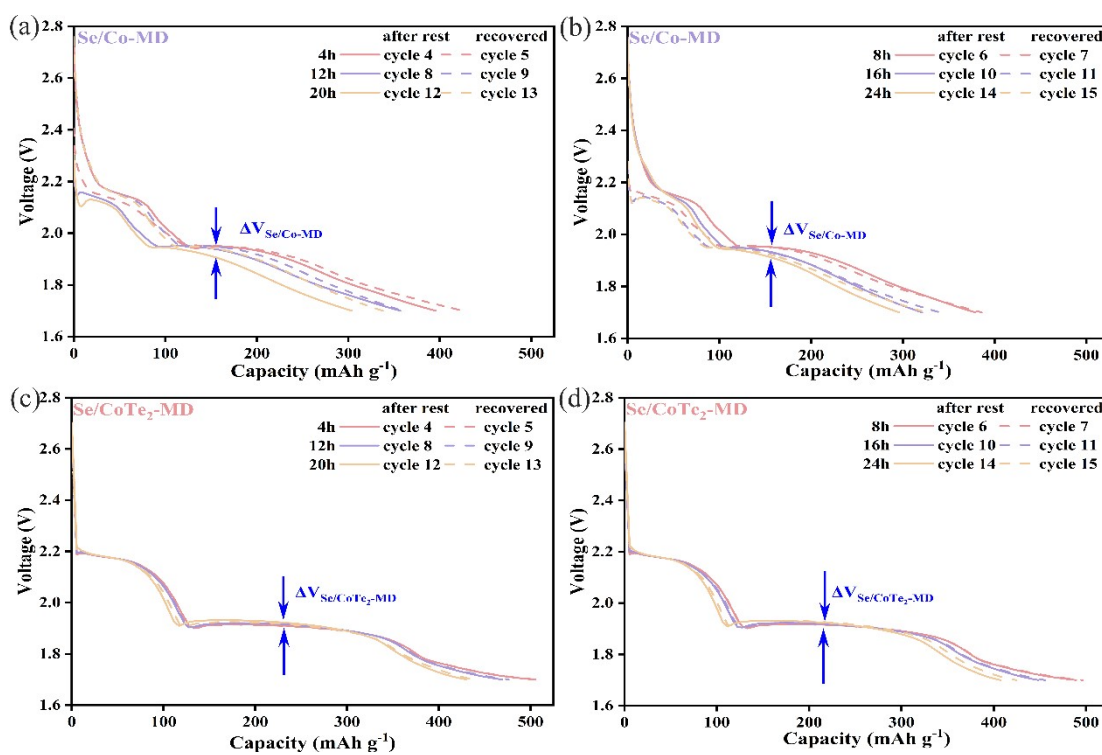

**Fig. S7** Self-discharge profile shown after resting 4-8-12-16-20-24 h and respective recovery cycle for  $\text{Se/CoTe}_2\text{-MD}$  and  $\text{Se/Co-MD}$  electrodes.

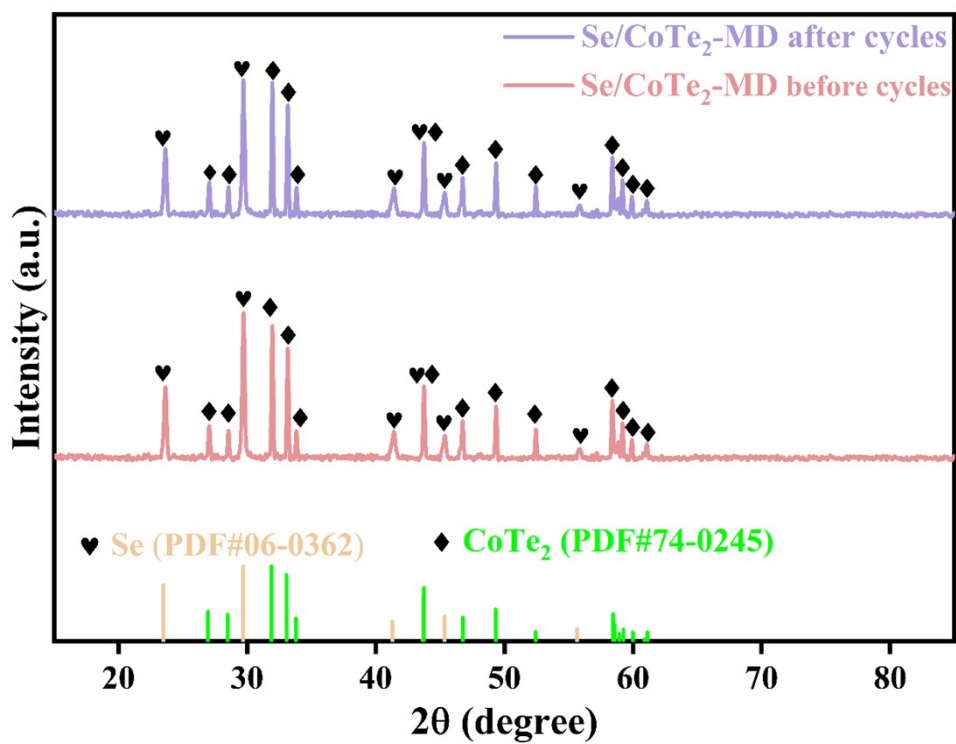

Fig. S8 XRD patterns of the Se/CoTe<sub>2</sub>-MD electrode before and after cycles.

**Table S1** Comparison of the electrochemical performance of Li-Se batteries using different matrix.

| Matrix                  | Discharge capacity(cycle number) |                                            | Rate capacity(rate, cycle number)                                                                                                                                                    |
|-------------------------|----------------------------------|--------------------------------------------|--------------------------------------------------------------------------------------------------------------------------------------------------------------------------------------|
|                         | 0.5C                             | 2C                                         |                                                                                                                                                                                      |
| CoTe <sub>2</sub> -MD   | 540.4(1st)<br>454.1(200th)       | 451.2(1st)<br>377.1(100th)<br>250.0(500th) | 592.9(0.2C,10th) → 538.7(0.5C, 20th) →<br>515.8(1C, 30th) → 457.3(2C, 40th) →<br>509.9(1C, 50th) → 526.9(0.5C, 60th)→<br>539.0(0.2C, 70th)                                           |
| MCM [S1]                | 513.0(1st)<br>300.0(100th)       | -                                          | 455.0(0.5C,10th) → 400.2(1C, 20th) →<br>375.6(2C, 30th) → 320.0(5C, 40th) →<br>291.0(0.5C, 50th)                                                                                     |
| HPCA [S2]               | 587.0(1st)<br>367.0(50th)        | -                                          | 425.0(0.5C,5th) → 400.0(1C, 10th) →<br>352.3(2C, 15th) → 303.2(3C, 20th) →<br>270.3(5C, 25th) → 305.7(0.5C, 30th) →<br>393.6(0.2C, 35th)                                             |
| CTAB-<br>MWCNT [S3]     | 570.4(1st)<br>230.8(200th)       | -                                          | 586.0(0.2C,10th) → 399.0(0.5C, 20th) →<br>215.7(1C, 30th) → 69.5(2C, 40th) →<br>205.6(1C, 50th) → 306.9(0.5C, 60th)→<br>397.8(0.2C, 70th)                                            |
| CMC [S4]                | 517.6*(1st)<br>257.6*(200th)     | 378.9*(1st)<br>166.3(460th)                | 420.4(0.2C,10th) → 352.6*(0.5C, 20th) →<br>302.6*(1C, 30th) → 250.2*(2C, 40th) →<br>218.1(5C,50th) →242.3*(2C, 60th)<br>→292.9*(1C, 70th) → 310.3*(0.5C, 60th)→<br>331.5(0.2C, 70th) |
| TiO <sub>2</sub> [S5]   | 481.0(1st)<br>158.0(50th)        | -                                          | -                                                                                                                                                                                    |
| MnO <sub>2</sub> [S6]   | -                                | 312.0(1st)<br>273.0(100th)                 | -                                                                                                                                                                                    |
| α-MoO <sub>3</sub> [S7] | 652.3(1st)<br>355.6(200th)       | 520.3(1st)<br>315.5(100th)                 | 569.4(0.2C,10th) → 456.7(0.5C, 20th) →<br>371.9(1C, 30th) → 318.2(2C, 40th) →<br>398.7(1C, 50th) → 458.4(0.5C, 60th)<br>→440.6* (0.2C, 70th)                                         |

\* Means the values from the images in the references.

## References

- [S1] L. Liu, Y. Wei, C. Zhang, et al, Enhanced electrochemical performances of mesoporous carbon microsphere/selenium composites by controlling the pore structure and nitrogen doping, *Electrochimica Acta*, 2015, **153**, 140-148.
- [S2] S. Jiang, Z. Zhang, Y. Lai, et al, Selenium encapsulated into 3D interconnected hierarchical porous carbon aerogels for lithium-selenium batteries with high rate performance and cycling stability, *Journal of Power Sources*, 2014, **267**, 394-404.
- [S3] R. Mukkabila, S. Deshagani, M. Deepa, et al, Carbon black free Selenium/CTAB decorated carbon nanotubes composite with high selenium content for Li-Se batteries, *Electrochimica Acta*, 2018, **283**, 63-74.
- [S4] T. Liu, M. Jia, Y. Zhang, et al, Confined selenium within metal-organic frameworks derived porous carbon microcubes as cathode for rechargeable lithium-selenium batteries, *Journal of Power Sources*, 2017, **341**, 53-59.
- [S5] Z. Zhang, X. Yang, X. Wang, et al, TiO<sub>2</sub>-Se composites as cathode material for rechargeable lithium-selenium batteries, *Solid State Ionics*, 2014, **260**, 101-106.
- [S6] N. Angulakshmi, R. S. Kumar, M. A. Kulandainathan, et al, Composite polymer electrolytes encompassing metal organic frame



works: a new strategy for all-solid-state lithium batteries, *The Journal of Physical Chemistry C*, 2014, **118**, 24240-24247.

[S7] K. W. Wu, J. Wang, C. S. Xu, et al, Hollow spherical  $\alpha$ -MoO<sub>3</sub>: an effective electrocatalyst of polyselenides for lithium-selenium batteries, *Acs Applied Energy Materials*, 2021, **4**, 10203-10212.
